**TRANSGENERATIONAL EFFECT OF EARLY CHILDHOOD FAMINE EXPOSURE  
IN THE COHORT OF LENINGRAD SIEGE SURVIVORS' OFFSPRING.**

Kristina Tolkunova<sup>1\*</sup>, Dmitrii Usoltsev<sup>1,2\*</sup>, Ekaterina Moguchaia<sup>1</sup>, Maria Boyarinova<sup>1</sup>,  
Ekaterina Kolesova<sup>1</sup>, Anastasia Erina<sup>1</sup>, Trudy Voortman<sup>3</sup>, Elena Vasilyeva<sup>1</sup>, Anna  
Kostareva<sup>1</sup>, Evgeny Shlyakhto<sup>1</sup>, Alexandra Konradi<sup>1,2</sup>, Oxana Rotar<sup>1,#</sup>, Mykyta  
Artomov<sup>1,2,4,5,#</sup>

1 - Almazov National Medical Research Centre, Saint Petersburg, Russia

2 - ITMO University, St. Petersburg, Russia

3 –Department of Epidemiology, Erasmus MC, University Medical Center, Rotterdam, The  
Netherlands

4 - Institute for Genomic Medicine, Nationwide Children's Hospital, Columbus, OH, USA

5 - Department of Pediatrics, College of Medicine, Ohio State University, Columbus, OH,  
USA

\* - contributed equally

# - Correspondence: [mykyta.artomov@nationwidechildrens.org](mailto:mykyta.artomov@nationwidechildrens.org), [oxana.rotar@gmail.com](mailto:oxana.rotar@gmail.com)

**The authors declare no conflict of interest**

1 **Abstract**

2 **Introduction:** Environmental exposure during early life development can affect  
3 disease risk in late-life period. There is little data on the transmission of phenotypic features  
4 from famine-exposed individuals to the next generations.

5 **Objective:** The purpose of our study was to investigate the association of parental  
6 starvation in the perinatal period and the period of early childhood with the phenotypic  
7 features observed in two generations of descendants of Leningrad Siege survivors (DLSS).

8 **Design and methods:** We examined 54 children and 30 grandchildren of 58 besieged  
9 Leningrad residents who suffered from starvation in early childhood and prenatal age during  
10 the Second World War. Controls from the population-based national epidemiological ESSE-  
11 RF study (n=175) were matched on sex, age and body mass index (BMI). Anthropometry,  
12 blood pressure (BP) measurement, and blood tests were performed for both groups.  
13 Sociodemographic and lifestyle information was collected via questionnaires. Phenotypes of  
14 controls and descendants (combined and children and grandchildren separately) were  
15 compared, taking into account multiple testing.

16 **Results:** Comparison of two generations descendants with corresponding control  
17 groups revealed significantly higher creatinine level and lower glomerular filtration rate  
18 (GFR), both in meta-analysis and in both generations independently. The mean values of GFR  
19 for all groups were detected within the normal range. Additionally, independent of the  
20 creatinine level, differences in the eating pattern were detected: insufficient fish consumption  
21 and excessive red meat consumption were significantly more frequent in the children of the  
22 Leningrad siege survivors compared with controls. BP and blood lipids did not differ between  
23 the groups.

24           **Conclusions:** Ancestral famine exposure in the prenatal period and early childhood  
25    may contribute to a decrease of in kidney filtration capacity and altered eating pattern in at  
26    least two generations of besieged Leningrad offspring.

## 27 **Introduction**

28           The theory of fetal origin of health and diseases suggests that parental environmental  
29 exposure during fetal development may be an important risk factor for adult-onset diseases, in  
30 particular, for cardiovascular diseases (CVD) (1). Susceptibility to diseases resulting from  
31 fetal programming can be observed directly after birth in exposed individuals or transmitted  
32 from the exposed generation to the descendants.

33           Major famine studies of the Dutch Famine 1944-1945 and the Chinese Famine 1959-  
34 1962 have shown that insufficient nutrition during prenatal and early life periods have critical  
35 impacts on fetal programming. Importantly, not only were individuals directly exposed to  
36 famine during the prenatal period shown to have phenotypic consequences of exposure in  
37 later life. It was suggested that the effect of fetal programming can be transmitted to the  
38 descendants of exposed individuals, potentially through epigenetic mechanisms. For example,  
39 the Dutch Hunger study observed a higher frequency of neonatal obesity in children of  
40 women exposed to malnutrition prenatally and a higher body mass index (BMI) at an older  
41 age in the offspring of prenatally malnourished men (2,3). The China Health and Nutrition  
42 Survey reported significantly lower glomerular filtration rate (GFR), and a faster than  
43 expected increase in BMI with age, waist circumference, and blood pressure (BP) in the first  
44 generation of descendants of exposed individuals (4,5). Therefore, transgenerational  
45 transmission of the famine exposure phenotype could be observed across at least one  
46 generation of descendants.

47           The Siege of Leningrad was another tragic example of catastrophic malnutrition of the  
48 city's residents having experienced a major supply deficit for two and a half years during the  
49 Second World War (6). There are some similarities but also difference with the two other  
50 major famine studies: The Siege of Leningrad was longer than Dutch Famine (28 months  
51 compared to about 6 months, respectively), the weather was significantly colder, affecting the

52 calorie demand and potential hypothermia, and daily rations were not restored after breaking  
53 the blockade (in the Netherlands daily rations quickly rose within a week) (7). The Chinese  
54 famine, which is comparable in duration to the famine during the Siege of Leningrad, was  
55 characterized by pandemic nature and uneven intensity distribution within the country (8).  
56 And both previously mentioned studies involved only one generation of descendants.

57 The purpose of our study was to investigate the association of starvation in the  
58 prenatal period and the period of early childhood with phenotypic differences later in life in  
59 two generations of descendants of Leningrad Siege survivors (DLSS).

## 60 **Materials and methods**

61 In 2009-2011, 305 Leningrad siege survivors who starved in early childhood and/or in  
62 utero during the Second World War (1941-1944) were examined in the Almazov National  
63 Medical Research Centre as part of an observational cohort study, the design and general  
64 characteristics were described in previous publications (6). In 2020-2021, we examined 87  
65 adult DLSS (57 children and 30 grandchildren from 55 families) of 58 Siege survivors, with  
66 the current pregnancy being the only exclusion criteria (**Figure 1A**). A subsample of a  
67 population-based cohort (N=1,600) of St. Petersburg residents aged 25-64 years within the  
68 national epidemiological study ESSE-RF (9) were selected as controls by matching gender,  
69 age and BMI distribution to each generation of descendants. In the current study we refer to  
70 Leningrad Siege survivors exposed to starvation in early life as generation zero ( $F_0$ ), their  
71 children as the first generation of DLSS ( $F_1$ ) and grandchildren as the second generation ( $F_2$ ).  
72 The final control cohorts included 127 individuals for  $F_1$  and 48 for  $F_2$ .

73 The study was approved by the Local Ethics Committee of the Almazov National  
74 Medical Research Centre (Protocol #2401-21 from the local ethics committee meeting #01-21  
75 dated January 18, 2021). All participants signed an informed consent.

76           Body weight measurement was carried out on the scales of the brand VEM-150- Mass-  
77   K (Russia), height - using the height meter RM-1 Diacoms (Russia), waist and hip  
78   circumference - using a standard flexible centimeter tape. Abdominal obesity was determined  
79   according to the JIS 2009 metabolic syndrome criteria 2009 (10) as: waist circumference  $\geq 94$   
80   cm for males and  $\geq 80$  cm for females. The BMI was calculated as the ratio of body weight in  
81   kilograms to height in meters squared. All respondents were classified as obese (BMI  $\geq 30$   
82   kg/m<sup>2</sup>) or non-obese (BMI  $< 30$  kg/m<sup>2</sup>).

83           Double measurement of blood pressure (BP) on the right arm was performed with the  
84   automatic tonometer "Omron" (Japan) with intervals of 2 minutes, after resting for 5 minutes  
85   in a sitting position, then a single measurement of BP was made 3 minutes after  
86   verticalization was made. Hypertension was diagnosed if the mean BP level was  $\geq 140/90$   
87   mmHg and/or if patient was receiving antihypertensive therapy.

88           The creatinine, blood glucose, lipids study (total cholesterol – TC, low-density  
89   lipoproteins – LDL, high-density lipoproteins – HDL, triglycerides – TG) measurement was  
90   performed in fasting state (AbbotArchitect 8000 (USA)). The levels of leptin (Leptin ELISA,  
91   DBC (Canada)) and adiponectin (Adiponectin ELISA, Mediagnost (Germany)) levels were  
92   determined by enzyme immunoassay. We assessed glucose metabolism disorders: participants  
93   were divided into fasting hyperglycemia group (glucose level  $\geq 5.6$  mmol/L) and diabetes  
94   mellitus group (the patients self-reported about diabetes). The GFR was calculated using the  
95   CKD-EPI formula (11). Groups of participants with high total cholesterol ( $> 4.9$  mmol/L),  
96   LDL ( $> 3.0$  mmol/L), triglycerides ( $\geq 1.7$  mmol/L), and reduced HDL (in male  $< 1.0$  and in  
97   female  $< 1.2$  mmol/L) were also formed; hypolipidemic therapy was taken into account (12).

98           Behavioral and socioeconomic risk factors were evaluated with questionnaires and  
99   interviews: diet pattern, smoking status, alcohol consumption, duration of sleep, level of  
100   education, physical activity. The consumption of fresh vegetables and fruits was assessed

101 (respondents were divided into those who had fresh fruits and vegetables in their daily diet  
102 and those who consumed irregularly). Excess salt intake was considered to be salting of  
103 ready-made foods. Consumption of fish (200 grams) less than 1-2 times a week was  
104 considered insufficient. Daily consumption of red meat (150 grams or more) was considered  
105 excessive (13). If the respondent consumed  $\geq 6$  pieces/spoons of sugar per day or daily/almost  
106 daily intake of sweets/confectionery, it was considered excessive intake of sweets. The  
107 duration of sleep of less than 6 hours a day was considered insufficient. Moderate physical  
108 activity  $\geq 150$  minutes per week was sufficient. Inactivity was recorded in the case of being in  
109 a sitting position for more than 9 hours on a weekday. The assessment of smoking status was  
110 also carried out, respondents were divided into groups: smoking at the moment, in the past,  
111 and those who have never smoked. The number of alcohol doses and the frequency of alcohol  
112 consumption were assessed and respondents were divided into those who regularly took  
113 alcoholic beverages and those who did not consume at all.

114 Mathematical and statistical data analysis was implemented using the R-4.0  
115 programming language (14) and libraries dplyr (v1.0.7) (15), ggplot2 (v3.3.5) (16), tidyr  
116 (v1.1.4) (17). Quantitative parameters were described using median values and lower and  
117 upper quartiles (Q1-Q3). Nominal data were described with absolute values and percentages.

118 The prevalence of 44 phenotypic risk factors in both generations of DLSS was  
119 simultaneously assessed using a logistic model adjusted for sex, generation and BMI. In case  
120 of absence of a phenotype in one of the comparison groups, a simple Fisher test was used  
121 instead of logistic regression. We report both effect size (beta) and odds ratio for each  
122 phenotype. If a phenotype was obtained from the other phenotype through calculations, we  
123 considered the pair as a single phenotype for multiple hypothesis correction with Bonferroni  
124 approach. In total, 34 independent phenotypes were analyzed and the significance threshold  
125 for the p-value was  $0.05/34=0.0015$ .

126

127

## 128 **Results**

129 87 DLSS (mean age: 43.8 years; sd: +/- 13.4 years; range: 18-63 years; 44% men)  
130 were observed during an ambulatory visit at Almazov National Medical Research Centre (St.  
131 Petersburg, Russia). The prevalence of abdominal and obesity did not differ significantly  
132 among BMI-matched participants. The BP levels and the prevalence of hypertension was non-  
133 remarkable compared to population average. The DLSS group had nominally higher HDL  
134 levels. The differences are described in more details in the supplementary and Tab. S1.

135 The DLSS cohort had 57 and 30 individuals from the first and F<sub>2</sub>, respectively (**Fig.**  
136 **1A**). Initially we performed matching of the DLSS cohort to a group of 1,600 controls from  
137 the ESSE population cohort from St. Petersburg. We excluded individuals with known  
138 cardiovascular diseases and outliers (more than 6 standard deviations) based on blood  
139 biochemical analyses and blood pressure measurements from the control pool. The final  
140 control pool available for matching had 1,142 individuals.

141 Controls of the same gender from the ESSE populational cohort were selected for each  
142 individual so that the age and BMI of the controls did not differ for more than two units. No  
143 controls were found for 8 DLSS individuals (7 youngest individuals from F<sub>2</sub>) and (1  
144 individual with high BMI from F<sub>2</sub>), therefore they were excluded from further analyses. 3  
145 individuals from F<sub>1</sub> of DLSS were excluded because they had cardiovascular disease. The  
146 final cohort included a total of 175 controls and 76 DLSS (127 controls and 54 DLSS for F<sub>1</sub>;  
147 48 controls and 22 DLSS for F<sub>2</sub>, **Sup. Fig. S1**).

148 Of all the biomarker phenotypes that were analyzed and compared, only creatinine  
149 ( $p=1.367 \times 10^{-7}$ ,  $\beta=0.092$ ,  $se=0.017$ ) and GFR ( $p=3.94 \times 10^{-8}$ ,  $\beta=-0.08$ ,  $se=0.015$ ) passed  
150 the Bonferroni significance threshold (**Fig. 1B, Sup. Tab. S1**). Additionally, insufficient fish



151 consumption was more frequently observed in the DLSS group compared to controls ( $p =$   
152  $3.15 \times 10^{-6}$ ;  $\beta = 1.361$ ;  $\beta \text{ se} = 0.292$ ), and also excessive red meat consumption was more  
153 frequently observed in the DLSS group ( $p = 1.8 \times 10^{-4}$ ;  $\beta = 1.168$ ;  $\beta \text{ se} = 0.312$ ) (Sup. Tab.  
154 S1). Among cardiometabolic risk factors, nominal differences were observed for leptin and  
155 HDL levels that were higher in the DLSS group, but still within normal ranges (leptin:  $p =$   
156  $3.12 \times 10^{-3}$ ,  $\beta = 0.037$ ; HDL:  $p = 9.47 \times 10^{-3}$ ,  $\beta = 1.08$ ) and not significant after multiple  
157 hypothesis testing correction.

158 Further, we investigated whether this effect could be observed in each generation  
159 separately. We analyzed the phenotypic data within each generation independently, adjusting  
160 the model for age, BMI, sex. Interestingly, the effect of creatinine and GFR was observed in  
161 both generations - F<sub>1</sub>: creatinine ( $p = 9.71 \times 10^{-5}$ ,  $\beta = 0.071$ ,  $\text{se} = 0.018$ ) and GFR ( $p = 1.09 \times 10^{-5}$ ,  
162  $\beta = -0.076$ ,  $\text{se} = 0.017$ ) and F<sub>2</sub>: creatinine ( $p = 3.56 \times 10^{-4}$ ,  $\beta = 0.208$ ,  $\text{se} = 0.058$ ) and GFR  
163 ( $p = 4.56 \times 10^{-4}$ ,  $\beta = -0.179$ ,  $\text{se} = 0.051$ ) (Sup. Tab. S1). The differences in fish and red meat  
164 intake habits passed Bonferroni correction only for F<sub>1</sub> (red meat:  $p = 3.10 \times 10^{-4}$ ;  $\beta = 1.39$ ;  
165  $\beta \text{ se} = 0.385$ . Fish:  $p = 5.23 \times 10^{-4}$ ;  $\beta = 1.197$ ;  $\beta \text{ se} = 0.345$ ), but estimates for F<sub>2</sub> were in  
166 similar direction and magnitude (red meat:  $p = 0.237$ ;  $\beta = 0.653$ ;  $\beta \text{ se} = 0.55$ . Fish:  $p =$   
167  $0.0015$ ;  $\beta = 1.897$ ;  $\beta \text{ se} = 0.598$ ) (Sup. Tab. S1).

168 In addition to the consumption of red meat and fish, several other nutritional  
169 phenotypes were nominally significant, therefore, we used the principal component analysis  
170 (PCA) based on food consumption-related phenotypes (fish, red meat, salt, sugar, vegetable  
171 intake, and leptin) to investigate differences in food pattern between DLSS and controls (**Sup.**  
172 **Fig. S2A**). We found that PC2, which was characterized by a low fish intake, leptin levels,  
173 and high salt and sugar intake, and differed significantly between descendants and controls for  
174 both the meta-analysis ( $p = 3.77 \times 10^{-9}$ ;  $\beta = -1.06$ ;  $\beta \text{ se} = 0.18$ ) and for each generation

175 separately:  $F_1$  ( $p = 2.15 \times 10^{-6}$ ;  $\beta = -1.00$ ;  $\beta \text{ se} = 0.211$ );  $F_2$  ( $p = 5.29 \times 10^{-4}$ ;  $\beta = -1.243$ ;  
176  $\beta \text{ se} = 0.359$ ) (**Sup. Tab. S2**).

177 Subsequently, we investigated whether the food pattern was related to the observed  
178 difference in creatinine level. From the control population that was not used in the previous  
179 comparisons, we selected individuals to match sex, age, and PC2 distributions obtained from  
180 the PCA of food intake in the DLSS cohort (**Sup. Fig. S2B**). Comparison of this cohort with  
181 the previously selected control cohort for DLSS comparison, we did not observe significant  
182 differences in creatinine and GFR ( $p = 0.75$ ;  $p = 0.61$ , respectively, **Sup. Fig. S2C**). Therefore,  
183 the pattern of food consumption and biochemical markers of renal function can be interpreted  
184 as independent associations.

185

## 186 **Discussion**

187 Our results demonstrate a significantly higher creatinine level and a lower glomerular  
188 filtration rate in the descendant generations of individuals exposed to prenatal or early  
189 childhood starvation. It is known that most human organs have a critical development period  
190 at the prenatal stage. In the case of serious nutritional deficiency, the number of functioning  
191 glomeruli decreases, leading to increased filtration load, increased GFR throughout postnatal  
192 life, and subsequent damage to functioning glomeruli (18). Reports on the Northern China  
193 famine cohort study also presented significantly lower calculated GFR in prenatally exposed  
194 participants to starvation and their children compared to controls. Data on the second  
195 generation were not available in this study. It has been hypothesized that the starvation of the  
196 ancestors in early childhood contributes to a decrease in the renal filtration capacity in their  
197 offspring. This may be due to transgenerational changes in the epigenome through the  
198 programming of nephron deficiency in germ cells (4). In the long term, renal filtration  
199 capacity can cause glomerulosclerosis, and finally hypertension in adulthood (18).

200 Observed differences in the dietary pattern between the descendants and controls do  
201 not have a clear direction of effect. On the one hand, increased red meat and decreased fish  
202 consumption increase the risk of cardiometabolic disorders (19,20). On the other hand, the  
203 decreased salt consumption and higher leptin levels might indicate a more healthy approach to  
204 food selection. Comparison of the subsample of the population cohort that matched in dietary  
205 behavior with DLSS with the control population indicated that the observed differences in  
206 creatine levels and food selection were independent of each other. Therefore, it is likely that  
207 there is an independent effect of dietary behavior imprinting observed in DLSS.

208 The absence of statistically significant differences in the prevalence of cardiometabolic  
209 diseases can be explained on the one hand by the small size of the cohort studied, and on the  
210 other hand by the relatively young age of most of the participants. Also, it is important to note  
211 that in this work we studied the offspring, among whom most of the parents are still alive,  
212 which may have resulted in survivorship bias. In addition, both a decrease in fertility and an  
213 increase in perinatal mortality during famine may have led to selective births of healthier or  
214 more resilient individuals. The besieged Leningrad residents included in the study could  
215 therefore represent an artificially "healthy" sample.

216 Conclusively, observation of phenotypic effects associated with early-in-life  
217 exposures, separated not only in time, but also by generations serve yet another example of  
218 Barker's hypothesis of fetal origins of chronic diseases of adult life. Our study suggests that  
219 not only individuals directly exposed to traumatic events, but their offspring will benefit from  
220 additional health screenings, in particular assessment of kidney function, for earlier detection  
221 of disease symptoms and their successful treatment.

222

223 **Figure Caption**

224           **Figure 1.** Comparison of descendants of Leningrad Siege survivors (DLSS) with  
225 population controls from St. Petersburg. **(A)** Graphical representation of all family trees in the  
226 DLSS cohort (Siege survivors -F<sub>0</sub>, the 1<sup>st</sup> generation of descendants - F<sub>1</sub>, the 2<sup>nd</sup> generation of  
227 descendants - F<sub>2</sub>); **(B)** Differences in GFR and creatinine levels between each generation of  
228 DLSS and the corresponding controls from the populational cohort of St. Petersburg.

### **Author Contributions**

K.T., D.U., O.R., M.A. designed and conceived the study.

K.T., D.U., E.M., M.B., E.K., A.E., T.V., O.R., M.A. collected and analyzed the data.

K.T., D.U., O.R., M.A. designed statistical analysis approach.

K.T., E.M., M.B., E.K., A.E., E.V., An.K., Al.K., O.R. recruited and supervised patients.

Al.K., E.S., M.A. – obtained funding.

O.R., M.A. supervised the study

K.T., D.U., O.R., M.A. wrote the manuscript

All authors edited and reviewed the manuscript text

### **Funding**

K.T., D.U., E.M., M.B., E.K., A.E., E. V., An.K., E.S., Al.K., O.R. were supported by the Ministry of Science and Higher Education of the Russian Federation (Agreement #075-15-2022-301).

M.A. was supported by Nationwide Foundation Pediatric Innovation Fund.

### **References**

1. Barker DJ. Fetal origins of coronary heart disease. *BMJ*. 1995;311(6998):171-4. doi: 10.1136/bmj.311.6998.171

2. Painter RC, Osmond C, Gluckman P, Hanson M, Phillips DI, Roseboom TJ. Transgenerational effects of prenatal exposure to the Dutch famine on neonatal adiposity and health in later life. *BJOG*. 2008;115:1243–9. doi:10.1111/j.1471-0528.2008.01822
3. Veenendaal MVE, Painter RC, de Rooij SR, Bossuyt PM, van der Post JA, Gluckman PD, et al. Transgenerational effects of prenatal exposure to the 1944-45 Dutch famine. *BJOG*. 2013;120:548–54. doi:10.1111/1471-0528.12136pmid
4. Jiang W, Han T, Duan W, Dong Q, Hou W, Wu H, et al. Prenatal famine exposure and estimated glomerular filtration rate across consecutive generations: association and epigenetic mediation in a population-based cohort study in Suihua China. *Aging (Albany NY)*. 2020;12(12):12206-12221. doi:10.18632/aging.103397
5. Li J, Yang Q, An R, Sesso HD, Zhong VW, Chan KHK, et al. Famine and Trajectories of Body Mass Index, Waist Circumference, and Blood Pressure in Two Generations: Results From the CHNS From 1993-2015. *Hypertension*. 2022;79(3):518-531. doi: 10.1161/HYPERTENSIONAHA.121.18022
6. Rotar O, Moguchaia E, Boyarinova M, Kolesova E, Khromova N, Freylikhman O, et al. Seventy years after the siege of Leningrad: does early life famine still affect cardiovascular risk and aging? *J Hypertens*. 2015;33(9):1772-9. doi: 10.1097/HJH.0000000000000640
7. Fredrick J, Stare MD, Nutritional Conditions in Holland. *Nutrition Reviews*. 1945;8(3):225–227. doi:10.1111/j.1753-4887.1945.tb08647.x
8. Susser E, St Clair D. Prenatal famine and adult mental illness: interpreting concordant and discordant results from the Dutch and Chinese Famines. *Soc Sci Med*. 2013;97:325-30. doi: 10.1016/j.socscimed.2013.02.049
9. Orlov AV, Rotar OP, Boyarinova MA, Alieva AS, Dudorova EA, Kolesova EP, et al. Gender characteristics of the prevalence of behavioral risk factors in St. Petersburg residents. *Bulletin*

of the Russian Academy of Medical Sciences. 2015;70(5):585-591. (In Russ.) doi: 10.15690/vramn.v70.i5.1446.

10. Alberti KG, Eckel RH, Grundy SM, Zimmet PZ, Cleeman JI, Donato KA, et al. International Diabetes Federation Task Force on Epidemiology and Prevention; National Heart, Lung, and Blood Institute; American Heart Association; World Heart Federation; International Atherosclerosis Society; International Association for the Study of Obesity. Harmonizing the metabolic syndrome: a joint interim statement of the International Diabetes Federation Task Force on Epidemiology and Prevention; National Heart, Lung, and Blood Institute; American Heart Association; World Heart Federation; International Atherosclerosis Society; and International Association for the Study of Obesity. *Circulation*. 2009;120(16):1640–1645, doi: 10.1161/CIRCULATIONAHA.109.192644
11. Moiseev VC, Mukhin NA, Smirnov AV, Kobalava JD, Bobkova IN, Villevalde SV, et al. Cardiovascular risk and chronic kidney disease: cardio-nephroprotection strategies. *Russian Journal of Cardiology*. 2014;(8):7-37. (In Russ.) doi: 10.15829/1560-4071-2014-8-7-37
12. Kobalava ZD, Konradi AO, Nedogoda SV, Shlyakhto EV, Arutyunov GP, Baranova EI, et al. Arterial hypertension in adults. Clinical guidelines 2020. *Russian Journal of Cardiology*. 2020;25(3):3786. (In Russ.) doi:10.15829/1560-4071-2020-3-3786
13. Visseren FLJ, Mach F, Smulders YM, Carballo D, Koskinas KC, Bäck M, et al; ESC National Cardiac Societies; ESC Scientific Document Group. 2021 ESC Guidelines on cardiovascular disease prevention in clinical practice. *Eur Heart J*. 2021;42(34):3227-3337. doi: 10.1093/eurheartj/ehab484
14. R Core Team (2021). R: A language and environment for statistical computing. R Foundation for Statistical Computing, Vienna, Austria. URL <https://www.R-project.org/>.
15. Wickham H, François R, Henry L, Müller K. (2021). dplyr: A Grammar of Data Manipulation. R package version 1.0.7. <https://CRAN.R-project.org/package=dplyr>

16. Wickham H. *ggplot2: Elegant Graphics for Data Analysis*. Springer-Verlag New York, 2016.  
ISBN: 978-3-319-24277-4
17. Wickham H., Henry L. (2021). *tidyr: Tidy Messy Data*. R package version 1.1.4.  
<https://CRAN.R-project.org/package=tidyr>
18. Lejarraga H. Perinatal origin of adult diseases. *Arch Argent Pediatr*. 2019;117(3):e232-e242.  
English, Spanish. doi: 10.5546/aap.2019.eng.e232
19. Bechthold A, Boeing H, Schwedhelm C, Hoffmann G, Knüppel S, Iqbal K, et al. Food groups and risk of coronary heart disease, stroke and heart failure: A systematic review and dose-response meta-analysis of prospective studies. *Crit Rev Food Sci Nutr*. 2019;59(7):1071-1090. doi: 10.1080/10408398.2017.1392288
20. Pan L, Chen L, Lv J, Pang Y, Guo Y, Pei P, et al. Association of Red Meat Consumption, Metabolic Markers, and Risk of Cardiovascular Diseases. *Front Nutr*. 2022;9:833271. doi: 10.3389/fnut.2022.833271

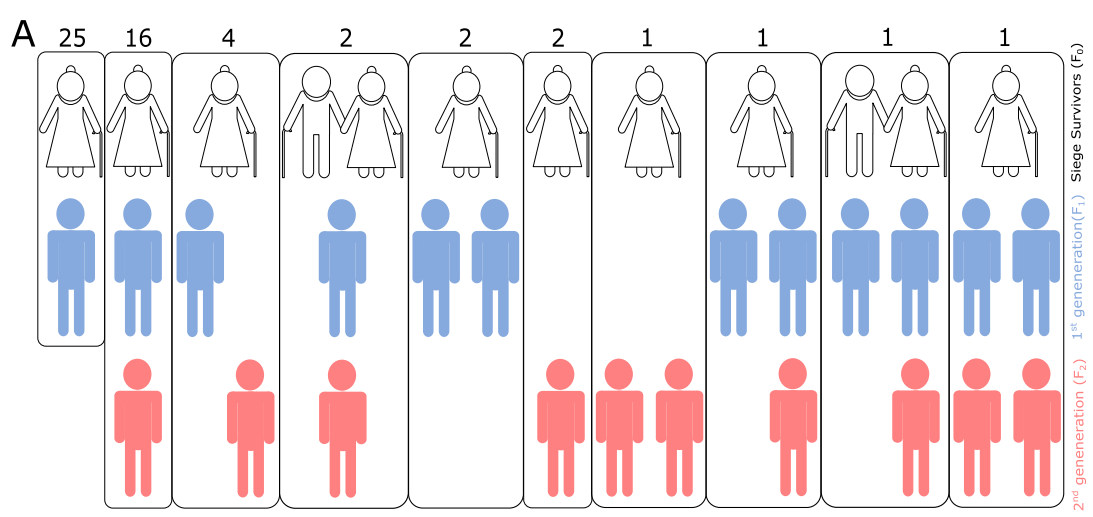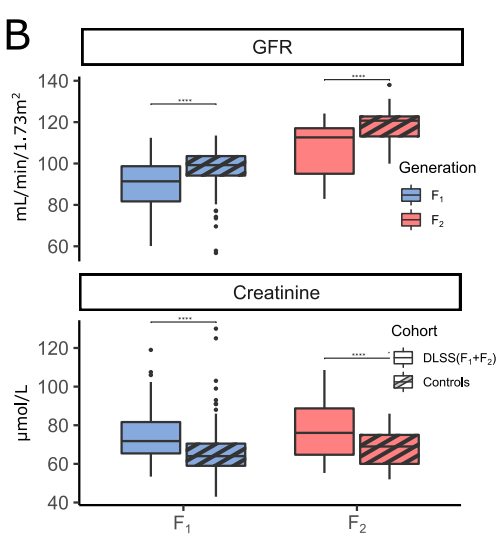

Source: http://medrxiv.org/content/10.1101/2022.11.04.22281954v1.full.pdf
